# Supplementary material for: Genomic evidence for homoploid hybrid speciation between ancestors of two different genera
Source: PubMed Central journal article supplement (PMC9008057; doi:10.1038/s41467-022-29643-4), 2022-04-13
Supplement: 41467_2022_29643_MOESM3_ESM.pdf [file 41467_2022_29643_MOESM3_ESM.pdf]

### **Description of Additional Supplementary Files**

File Name: Supplementary Data 1

Description: Summary of studies on HHS and introgression (from 2012 to 2021) based on population genomic data.

File Name: Supplementary Data 2

Description: . Individuals sampled in this study and their locations.

File Name: Supplementary Data 3

Description: Assessment of different reference genomes using randomly selected samples.

File Name: Supplementary Data 4

Description: Genome-resequencing statistics for the individuals sampled in this study.

File Name: Supplementary Data 5

Description: PSGs identified in sect. *Distegocarpus* derived from sect. *Carpinus*.

File Name: Supplementary Data 6

Description: PSGs identified in sect. *Distegocarpus* derived from *Ostrya*.

File Name: Supplementary Data 7

Description: Genes identified as harboring hybrid signals.
